# Supplementary material
Source: PubMed Central journal article supplement (PMC2737082)
Supplement: NIHMS132646-supplement-1_si_001.pdf [file NIHMS132646-supplement-1_si_001.pdf]

## Supporting Information

### Biosynthesis of Salinosporamides from $\alpha,\beta$ -Unsaturated Fatty Acids: Implications for Extending Polyketide Synthase Diversity

Yuan Liu,<sup>†</sup> Christopher Hazzard,<sup>‡</sup> Alessandra S. Eustáquio,<sup>†</sup> Kevin A. Reynolds,<sup>‡</sup> and Bradley S. Moore<sup>\*†§</sup>

<sup>†</sup>*Scripps Institution of Oceanography and the* <sup>§</sup>*Skaggs School of Pharmacy and Pharmaceutical Sciences, University of California at San Diego, La Jolla, CA 92093-0204, and* <sup>‡</sup>*Department of Chemistry, Portland State University, Portland, OR 97207-0751*

**General procedure for the feeding experiments.** The *S. tropica* CNB-440 *salL*<sup>-</sup> mutant<sup>1</sup> was cultured in Fernbach flasks containing A1 seawater-based media supplemented with Amberlite XAD-7 resin as previously described.<sup>2</sup> Compounds were added aseptically after 24 h of growth. Salinosporamides were obtained by acetone elution from the polymer resin and analyzed by HPLC-MS as described.<sup>3</sup>

**Feeding experiment of sodium [1-<sup>13</sup>C]propionate to the *S. tropica salL*-deficient mutant.** Following the general procedure, sodium [1-<sup>13</sup>C]propionate was added as a sterilized aqueous solution (100 mg/L) to the mutant. [1-<sup>13</sup>C]Salinosporamide D (2.0 mg/L) and [12-<sup>13</sup>C]salinosporamide E (4.5 mg/L) were purified via RP HPLC (Luna C-18, 5  $\mu$ m, 250 x 10 mm, flow rate 2.5 mL/min, detection at 210 nm) using a gradient method (38% MeCN in H<sub>2</sub>O for 18 min, 38%  $\rightarrow$  100% within 22 min). Salinosporamides D and E eluted at 15 and 29 min, respectively.

**[1-<sup>13</sup>C]Salinosporamide D:** white solid; <sup>13</sup>C NMR (100 MHz, DMSO-*d*<sub>6</sub>):  $\delta$  176.0 (C-1, 5% enriched), 169.0 (C-14), 128.5 (C-7), 127.8 (C-8), 86.1 (C-3), 78.4 (C-4), 69.1 (C-5), 43.1 (C-2), 37.7 (C-6), 25.3 (C-11), 24.6 (C-9), 21.0 (C-10), 18.7 (C-13), 7.4 (C-12). See Supplementary Figure S1.

**[12-<sup>13</sup>C]Salinosporamide E:** white solid; <sup>13</sup>C NMR (100 MHz, DMSO-*d*<sub>6</sub>):  $\delta$  176.0 (C-1), 158.9 (C-16), 128.6 (C-7), 127.7 (C-8), 86.1 (C-3), 78.6 (C-4), 69.1 (C-5), 47.5 (C-2), 37.7 (C-6), 26.9 (C-12, 40% enriched), 25.3 (C-11), 24.6 (C-9), 21.0 (C-10), 20.4 (C-13), 20.0 (C-15), 14.1 (C-14). See Supplementary Figure S2.

**Feeding experiments with unlabeled precursors to the *S. tropica salL*-deficient mutant.** Following the above general procedure, pentanoic acid (8.1 mg per 100 ml culture), *trans*-2-pentenoic acid (8.0 mg per 100 ml culture), 4-bromocrotonic acid (1.0 mg per 50 ml culture), and 4-fluorocrotonic acid (0.8 mg per 50 ml culture) in EtOH were added to the *salL*<sup>-</sup> mutant in triplicate. Six days after the inoculations, salinosporamides were obtained by acetone elution from the polymer resin and analyzed by HPLC-MS as described.<sup>3</sup>

**Synthesis of 4-bromocrotonic acid and 4-fluorocrotonic acid.** These compounds were prepared according to known or slightly modified literature procedures as summarized in Supplementary Scheme 1. 4-Bromocrotonic acid<sup>4</sup> was obtained from the reaction of 4-chlorocrotonic acid<sup>5</sup> with sodium bromide in acetone. 4-Fluorocrotonic acid<sup>6</sup> was synthesized from epifluorohydrin in four steps involving nucleophilic attack of cyanide ion upon the epoxide ring<sup>7</sup> followed by the ethanolysis<sup>8</sup> and dehydration to form the  $\alpha,\beta$ -unsaturated ester<sup>9,10</sup> and hydrolyzed to the acid.<sup>6</sup>

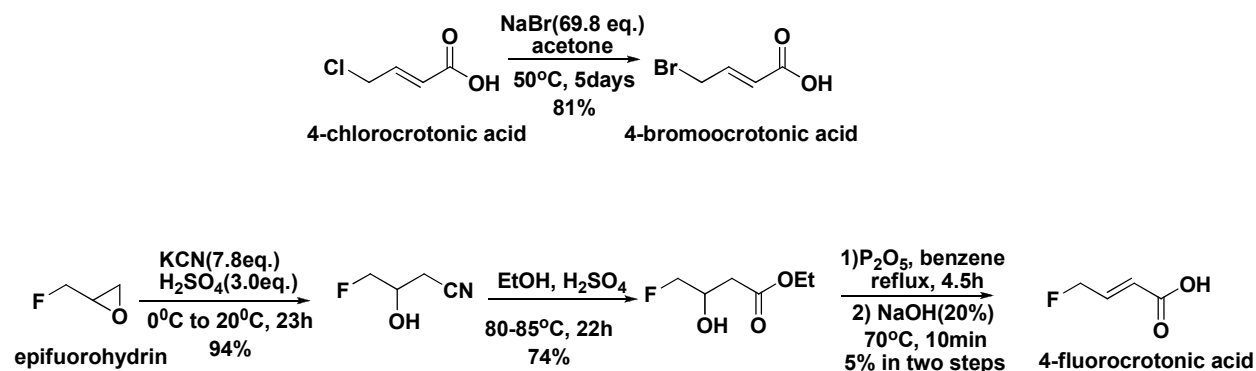

**Supplementary Scheme 1.** Summary of the synthesis of 4-bromo- and 4-fluorocrotonic acid.

**(E)-4-bromocrotonic acid.** To a solution of 4-chlorocrotonic acid (0.41 g, 3.40 mmol)<sup>5</sup> in acetone (180 ml) was added NaBr (24.42 g, 237.35 mmol, 69.8 eq.) and stirred at 50 °C for 5 days. After the salt was filtered off, the solution was concentrated and purified by flash chromatography (3:1 hexane: ethyl acetate) to afford the white solid (0.46 g, 81%). <sup>1</sup>H NMR (400 MHz, CDCl<sub>3</sub>):  $\delta$  4.03 (dd,  $J$  = 7.6, 1.2 Hz, 2H), 6.05 (dt,  $J$  = 15.2, 1.2 Hz, 1H), 7.10 (dt,  $J$  = 15.2, 7.2 Hz, 1H).

**Characterization of SalG.** Recombinant SalG was prepared and assayed as previously described.<sup>3</sup> Assay conditions involved SalG (21 nM) incubated with various concentrations of *trans*-2-pentenyl-CoA in reaction buffer (100 mM Tris-HCl, pH 7.9) under saturating levels of NADPH and NaHCO<sub>3</sub>. Data were collected in triplicate, averaged and apparent  $k_{cat}$  and  $K_M$  determined by nonlinear regression with GraFit 4.012 (Middlessex, U.K.). See Supplementary Figure S3 for kinetic plots. Confirmation of the propylmalonyl-CoA product from 5 mL of SalG-catalyzed reactions was carried out by LC-MS analysis. LC conditions comprised a H<sub>2</sub>O to MeOH gradient containing 5 mM NH<sub>4</sub>OAc with a flow rate of 0.3 ml/min on an Agilent 1200 system using a 2.1  $\mu$ m Discovery HS C18 reversed phase column (Supelco). Mass spectra were collected on a micrOTOF\_Q (Bruker Daltonics) mass spectrometer equipped with an electrospray ion source operating in positive mode. ESI-MS  $m/z$  850.1 (*trans*-2-pentenyl-CoA),  $m/z$  896.1 (propylmalonyl-CoA).

**Trans-2-pentenyl-coenzyme A.** To a solution of *trans*-2-pentenoic acid (52 mg, 0.514 mmol, 80 equiv.) in anhydrous THF (8 ml), cooled to 0 °C and under argon, was added triethylamine (72  $\mu$ L, 0.514 mmol, 80 equiv.) followed by ethyl chloroformate (10  $\mu$ L, 0.103 mmol, 6 equiv.). The

resulting was stirred at 0 °C for 45 min and then centrifuged. The THF supernatant was added slowly to a solution of hydrated coenzyme A (5 mg, 0.006 mmol, 1 equiv.) and NaHCO<sub>3</sub> (30 mg, 0.36 mmol) in dd H<sub>2</sub>O (3 ml). The reaction mixture was stirred at room temperature for 4 hr after which the THF was removed in vacuo. The aqueous solution was acidified to pH 3 using 1 N HCl and then extracted with EtOAc (3 x 3 ml) to remove excess trans-2-pentenoic acid. The aqueous solution was then lyophilized and the resulting solid was washed with MeOH to recover trans-2-pentenyl-CoA as a white solid. LC-MS analysis was used to confirm formation of the pentenyl-CoA substrate.

## References:

- (1) Eustáquio, A. S.; Pojer, F.; Noel, J. P.; Moore, B. S. *Nat. Chem. Biol.* **2008**, *4*, 69-74.
- (2) Beer, L.; Moore, B.S. *Org. Lett.* **2007**, *9*, 845-848.
- (3) Eustáquio, A. S.; McGlinchey, R. P.; Liu, Y.; Hazzard, C.; Beer, L. L.; Florova, G.; Alhamadsheh, M. M.; Lechner, A.; Kale, A. J.; Kobayashi, Y.; Reynolds, K. A.; Moore, B. S. *Proc. Natl. Acad. Sci. U.S.A.* **2009**, in press.
- (4) Salomon, C. J.; Mata, E. G.; Mascaretti, O. A. *J. Org. Chem.* **1994**, *59*, 7259-7266.
- (5) Tunge, J.A.; Mellegaard, S. R. *Org. Lett.* **2004**, *6*, 1205-1207.
- (6) McBee, E.T.; Keogh, M. J.; Levek, R. P.; Wesseler, E. P. *J. Org. Chem.* **1973**, *38*, 632-636.
- (7) Ramachandran, P. V.; Gong, B.; Brown, H. C. *J. Org. Chem.* **1995**, *60*, 41-46.
- (8) Hwang, S. O.; Ryu, H. Y.; Chung, S. H. *PCT Int. Appl.* **2007**, WO 2007139238.
- (9) Bergmann E. D.; Cohen, S.; Shahak, I. *J. Chem. Soc.* **1961**, 3448-3452.
- (10) Guha, S. H.; Shibayama, A.; Abe, D.; Sakaguchi, M.; Ukaji, Y.; Inomata, K. *Bull. Chem. Soc. Jpn.* **2004**, *77*, 2147-2157.

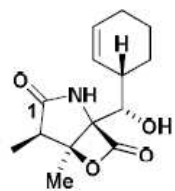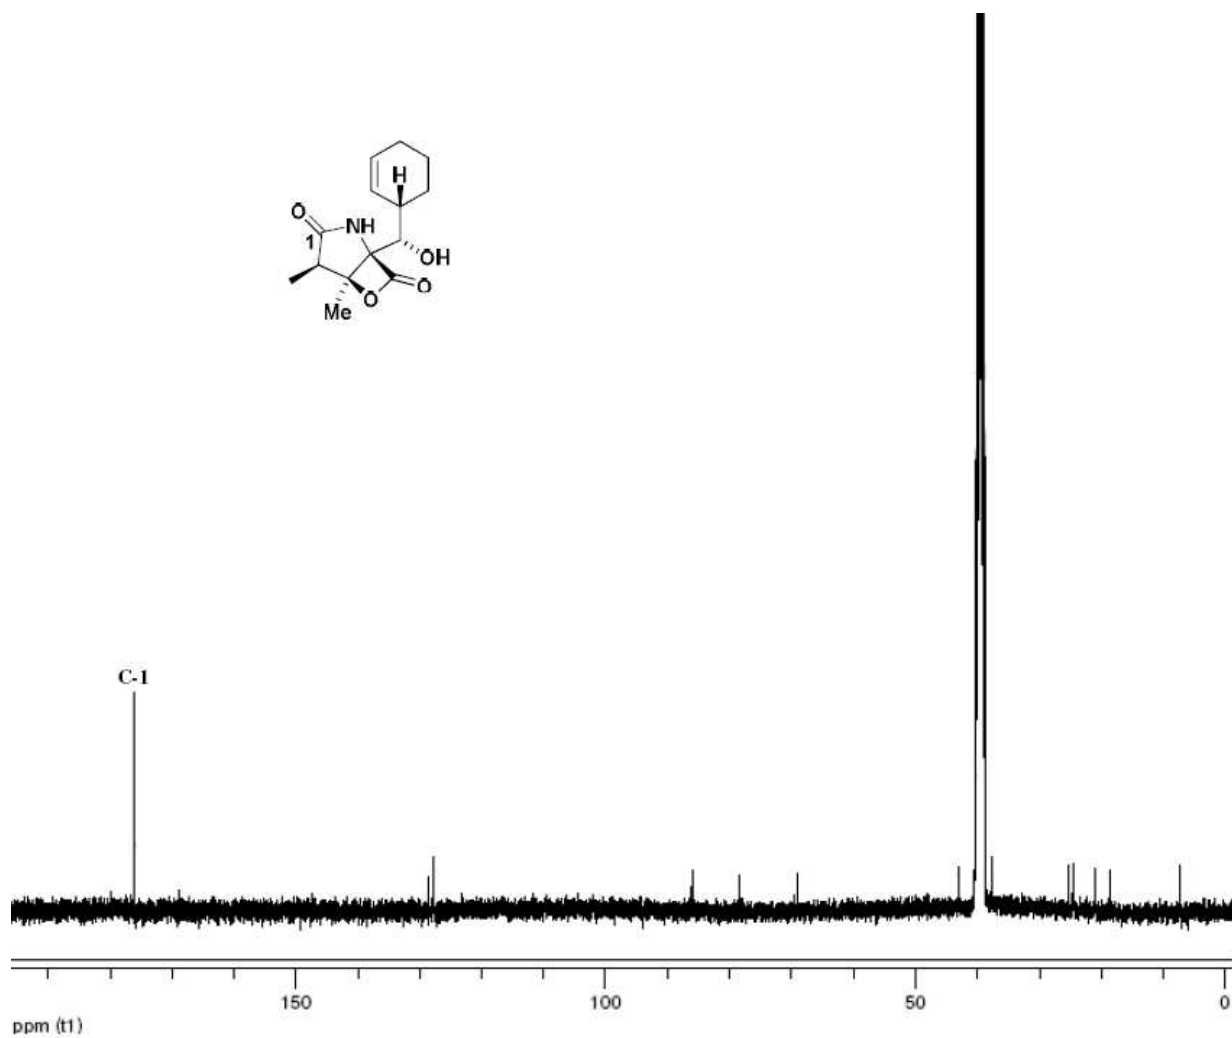

Supplementary Figure S1.  $^{13}\text{C}$  NMR spectrum of [1- $^{13}\text{C}$ ]salinosporamide D in  $\text{DMSO-}d_6$

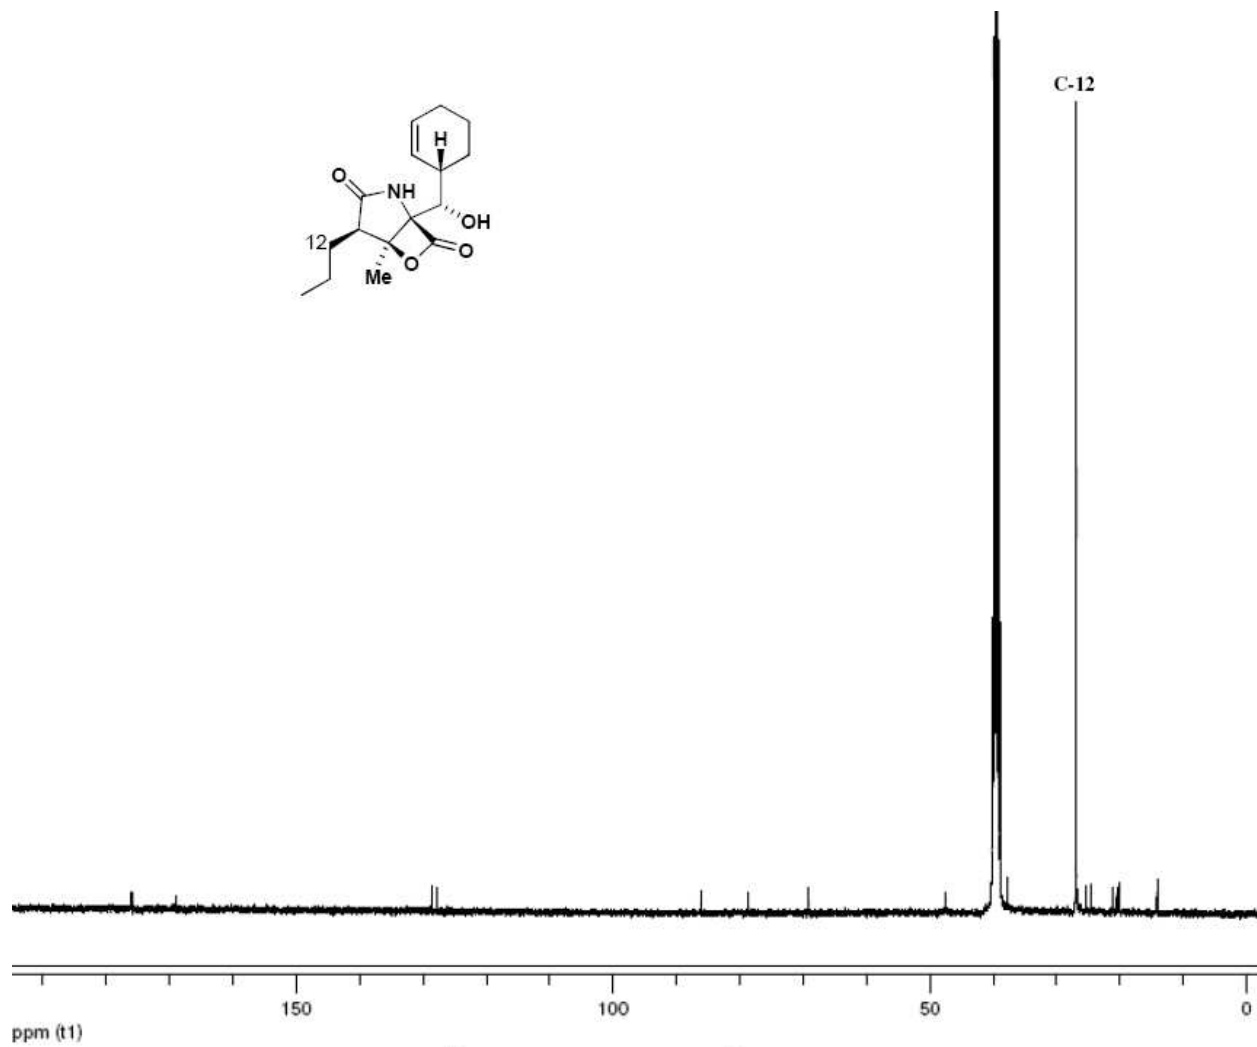

Supplementary Figure S2.  $^{13}\text{C}$  NMR spectrum of [12- $^{13}\text{C}$ ]salinosporamide E in  $\text{DMSO-}d_6$

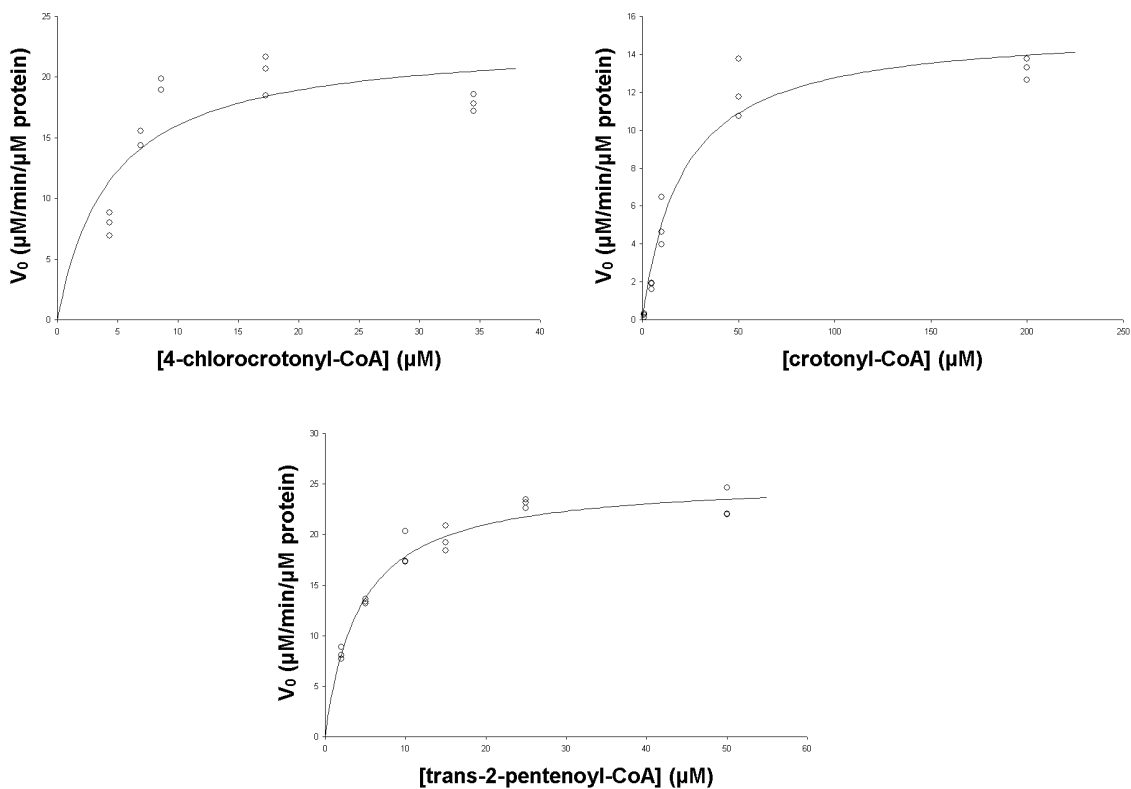

Supplementary Figure S3. Kinetic plots showing rate of SalG-catalyzed reductive carboxylation of substrates (4-chlorocrotonyl-CoA, crotonyl-CoA, and trans-2-pentenoyl-CoA) versus substrate concentrations.
